# Supplementary material for: Microarray-Based Detection of Antibodies against SARS-CoV-2 Proteins, Common Respiratory Viruses and Type I Interferons
Source: MDPI journal article supplement (doi:10.3390/v13122553), 2021-12-20
Supplement: s1 [file s1]

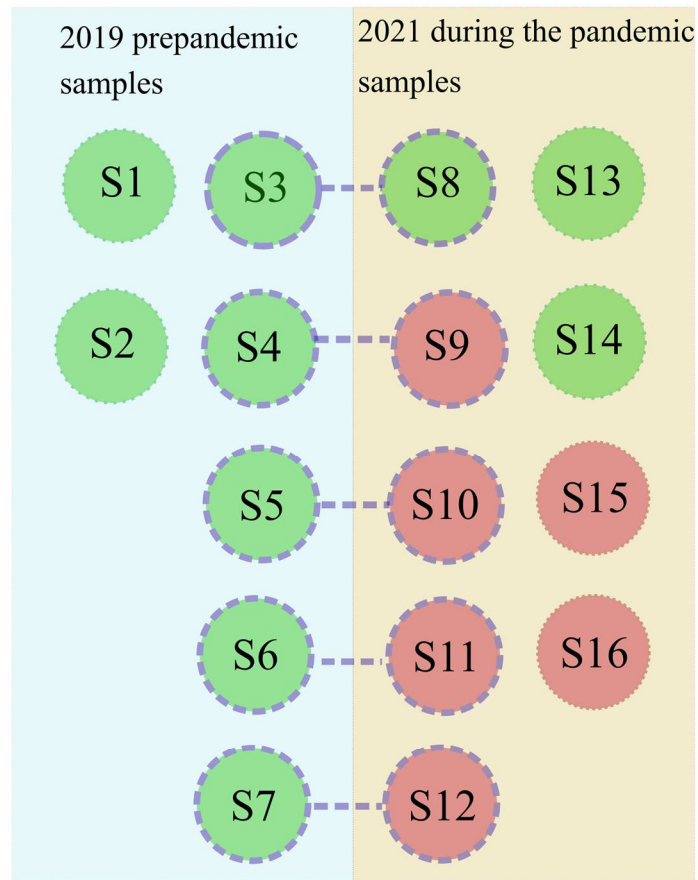

**Figure S1.** APS-1 patient's samples collected in 2019 and 2021. Green circles represent serum samples from APS-1 patients who have not been infected with SARS-CoV-2, and red circles show samples from COVID-19 recovered patients. Paired prepandemic and pandemic samples are highlighted with a dashed line.
